# Supplementary material
Source: publisher figshare collection journal article supplement (https://springernature.figshare.com/ndownloader/files/28130904)
Supplement: Supplementary file 1 [file 28130904]

datetime	id	value
1588302000	2	0.013
1588302000	3	0.05
1588302000	5	0.051
1588302000	6	0.003
1588302000	9	0.048
1588302900	2	0.017
1588302900	3	0.05
1588302900	5	0.063
1588302900	6	0.004
1588302900	9	0.041
1588303800	2	0.024
1588303800	3	0.05
1588303800	5	0.045
1588303800	6	0.002
1588303800	9	0.048
1588304700	2	0.014
1588304700	3	0.049
1588304700	5	0.054
1588304700	6	0.003
1588304700	9	0.035
1588305600	2	0.015
1588305600	3	0.049
1588305600	5	0.05
1588305600	6	0.004
1588305600	9	0.009
1588306500	2	0.024
1588306500	3	0.049
1588306500	5	0.033
1588306500	6	0.003
1588306500	9	0.056
1588307400	2	0.016
1588307400	3	0.05
1588307400	5	0.052
1588307400	6	0.003
1588307400	9	0.024
1588308300	2	0.013
1588308300	3	0.049
1588308300	5	0.023
1588308300	6	0.003
1588308300	9	0.023
1588309200	2	0.023
1588309200	3	0.048
1588309200	5	0.058
1588309200	6	0.003
1588309200	9	0.008
1588310100	2	0.018
1588310100	3	0.049
1588310100	5	0.023
1588310100	6	0.003
1588310100	9	0.018
1588311000	2	0.011
1588311000	3	0.049
1588311000	5	0.053
1588311000	6	0.003
1588311000	9	0.049
1588311900	2	0.023
1588311900	3	0.05
1588311900	5	0.032
1588311900	6	0.003
1588311900	9	0.034
1588312800	2	0.021
1588312800	3	0.05
1588312800	5	0.043
1588312800	6	0.003
1588312800	9	0.007
1588313700	2	0.008
1588313700	3	0.05
1588313700	5	0.044
1588313700	6	0.003
1588313700	9	0.025
1588314600	2	0.023
1588314600	3	0.05
1588314600	5	0.032
1588314600	6	0.003
1588314600	9	0.024
1588315500	2	0.022
1588315500	3	0.051
1588315500	5	0.049
1588315500	6	0.003
1588315500	9	0.01
1588316400	2	0.009
1588316400	3	0.05
1588316400	5	0.034
1588316400	6	0.003
1588316400	9	0.056
1588317300	2	0.02
1588317300	3	0.05
1588317300	5	0.044
1588317300	6	0.002
1588317300	9	0.025
1588318200	2	0.023
1588318200	3	0.05
1588318200	5	0.041
1588318200	6	0.003
1588318200	9	0.018
1588319100	2	0.01
1588319100	3	0.05
1588319100	5	0.036
1588319100	6	0.003
1588319100	9	0.006
1588320000	2	0.018
1588320000	3	0.049
1588320000	5	0.05
1588320000	6	0.003
1588320000	9	0.025
1588320900	2	0.023
1588320900	3	0.05
1588320900	5	0.026
1588320900	6	0.003
1588320900	9	0.035
1588321800	2	0.012
1588321800	3	0.051
1588321800	5	0.069
1588321800	6	0.003
1588321800	9	0.035
1588322700	2	0.016
1588322700	3	0.051
1588322700	5	0.046
1588322700	6	0.003
1588322700	9	0.019
1588323600	2	0.023
1588323600	3	0.05
1588323600	5	0.041
1588323600	6	0.003
1588323600	9	0.025
1588324500	2	0.013
1588324500	3	0.05
1588324500	5	0.043
1588324500	6	0.003
1588324500	9	0.01
1588325400	2	0.015
1588325400	3	0.049
1588325400	5	0.031
1588325400	6	0.003
1588325400	9	0.014
1588326300	2	0.022
1588326300	3	0.051
1588326300	5	0.051
1588326300	6	0.003
1588326300	9	0.048
1588327200	2	0.016
1588327200	3	0.051
1588327200	5	0.022
1588327200	6	0.003
1588327200	9	0.031
1588328100	2	0.012
1588328100	3	0.048
1588328100	5	0.057
1588328100	6	0.006
1588328100	9	0.012
1588329000	2	0.024
1588329000	3	0.004
1588329000	5	0.025
1588329000	6	0.007
1588329000	9	0.037
1588329900	2	0.02
1588329900	3	0.0
1588329900	5	0.051
1588329900	6	0.006
1588329900	9	0.022
1588330800	2	0.061
1588330800	3	0.0
1588330800	5	0.032
1588330800	6	0.007
1588330800	9	0.009
1588331700	2	0.028
1588331700	3	0.0
1588331700	5	0.05
1588331700	6	0.014
1588331700	9	0.301
1588332600	2	0.015
1588332600	3	0.0
1588332600	5	0.045
1588332600	6	0.01
1588332600	9	0.294
1588333500	2	0.012
1588333500	3	0.0
1588333500	5	0.032
1588333500	6	0.006
1588333500	9	0.261
1588334400	2	0.022
1588334400	3	0.0
1588334400	5	0.053
1588334400	6	0.006
1588334400	9	0.272
1588335300	2	0.012
1588335300	3	0.0
1588335300	5	0.013
1588335300	6	0.038
1588335300	9	0.363
1588336200	2	0.038
1588336200	3	0.0
1588336200	5	0.027
1588336200	6	0.048
1588336200	9	0.029
1588337100	2	0.037
1588337100	3	0.0
1588337100	5	0.021
1588337100	6	0.047
1588337100	9	0.036
1588338000	2	0.023
1588338000	3	0.0
1588338000	5	0.02
1588338000	6	0.046
1588338000	9	0.034
1588338900	2	0.041
1588338900	3	0.0
1588338900	5	0.026
1588338900	6	0.045
1588338900	9	0.129
1588339800	2	0.037
1588339800	3	0.0
1588339800	5	0.012
1588339800	6	0.009
1588339800	9	0.373
1588340700	2	0.031
1588340700	3	0.0
1588340700	5	0.035
1588340700	6	0.004
1588340700	9	0.743
1588341600	2	0.015
1588341600	3	0.0
1588341600	5	0.004
1588341600	6	0.002
1588341600	9	0.534
1588342500	2	0.018
1588342500	3	0.0
1588342500	5	0.037
1588342500	6	0.006
1588342500	9	0.088
1588343400	2	0.026
1588343400	3	0.0
1588343400	5	0.011
1588343400	6	0.003
1588343400	9	0.145
1588344300	2	0.009
1588344300	3	0.0
1588344300	5	0.037
1588344300	6	0.003
1588344300	9	0.021
1588345200	2	0.021
1588345200	3	0.0
1588345200	5	0.045
1588345200	6	0.003
1588345200	9	0.014
1588346100	2	0.022
1588346100	3	0.0
1588346100	5	0.035
1588346100	6	0.002
1588346100	9	0.026
1588347000	2	0.008
1588347000	3	0.0
1588347000	5	0.589
1588347000	6	0.002
1588347000	9	0.032
1588347900	2	0.021
1588347900	3	0.0
1588347900	5	0.722
1588347900	6	0.002
1588347900	9	0.058
1588348800	2	0.021
1588348800	3	0.0
1588348800	5	0.049
1588348800	6	0.002
1588348800	9	0.005
1588349700	2	0.02
1588349700	3	0.0
1588349700	5	0.029
1588349700	6	0.002
1588349700	9	0.026
1588350600	2	0.054
1588350600	3	0.0
1588350600	5	0.021
1588350600	6	0.002
1588350600	9	0.025
1588351500	2	0.044
1588351500	3	0.0
1588351500	5	0.044
1588351500	6	0.003
1588351500	9	0.014
1588352400	2	0.039
1588352400	3	0.0
1588352400	5	0.006
1588352400	6	0.002
1588352400	9	0.032
1588353300	2	0.054
1588353300	3	0.0
1588353300	5	0.048
1588353300	6	0.002
1588353300	9	0.044
1588354200	2	0.039
1588354200	3	0.0
1588354200	5	0.027
1588354200	6	0.002
1588354200	9	0.025
1588355100	2	0.044
1588355100	3	0.0
1588355100	5	0.021
1588355100	6	0.002
1588355100	9	0.009
1588356000	2	0.05
1588356000	3	0.0
1588356000	5	0.044
1588356000	6	0.002
1588356000	9	0.016
1588356900	2	0.014
1588356900	3	0.0
1588356900	5	0.019
1588356900	6	0.002
1588356900	9	0.03
1588357800	2	0.018
1588357800	3	0.0
1588357800	5	0.047
1588357800	6	0.002
1588357800	9	0.059
1588358700	2	0.025
1588358700	3	0.0
1588358700	5	0.014
1588358700	6	0.002
1588358700	9	0.009
1588359600	2	0.013
1588359600	3	0.0
1588359600	5	0.028
1588359600	6	0.002
1588359600	9	0.018
1588360500	2	0.017
1588360500	3	0.0
1588360500	5	0.028
1588360500	6	0.007
1588360500	9	0.025
1588361400	2	0.024
1588361400	3	0.0
1588361400	5	0.023
1588361400	6	0.045
1588361400	9	0.02
1588362300	2	0.014
1588362300	3	0.0
1588362300	5	0.025
1588362300	6	0.043
1588362300	9	0.049
1588363200	2	0.039
1588363200	3	0.0
1588363200	5	0.032
1588363200	6	0.042
1588363200	9	0.022
1588364100	2	0.05
1588364100	3	0.0
1588364100	5	0.009
1588364100	6	0.027
1588364100	9	0.025
1588365000	2	0.042
1588365000	3	0.0
1588365000	5	0.042
1588365000	6	0.002
1588365000	9	0.017
1588365900	2	0.069
1588365900	3	0.0
1588365900	5	0.019
1588365900	6	0.002
1588365900	9	0.007
1588366800	2	0.05
1588366800	3	0.0
1588366800	5	0.04
1588366800	6	0.002
1588366800	9	0.055
1588367700	2	0.044
1588367700	3	0.0
1588367700	5	0.035
1588367700	6	0.007
1588367700	9	0.036
1588368600	2	0.04
1588368600	3	0.044
1588368600	5	0.022
1588368600	6	0.006
1588368600	9	0.011
1588369500	2	0.054
1588369500	3	0.05
1588369500	5	0.054
1588369500	6	0.025
1588369500	9	0.014
1588370400	2	0.05
1588370400	3	0.05
1588370400	5	0.056
1588370400	6	0.042
1588370400	9	0.025
1588371300	2	0.046
1588371300	3	0.05
1588371300	5	0.083
1588371300	6	0.057
1588371300	9	0.035
1588372200	2	0.055
1588372200	3	0.05
1588372200	5	0.085
1588372200	6	0.054
1588372200	9	0.032
1588373100	2	0.057
1588373100	3	0.05
1588373100	5	0.053
1588373100	6	0.053
1588373100	9	0.023
1588374000	2	0.018
1588374000	3	0.049
1588374000	5	0.08
1588374000	6	0.053
1588374000	9	0.024
1588374900	2	0.032
1588374900	3	0.05
1588374900	5	1.148
1588374900	6	0.058
1588374900	9	0.008
1588375800	2	0.033
1588375800	3	0.05
1588375800	5	0.157
1588375800	6	0.054
1588375800	9	0.017
1588376700	2	0.02
1588376700	3	0.049
1588376700	5	0.087
1588376700	6	0.049
1588376700	9	0.07
1588377600	2	0.029
1588377600	3	0.05
1588377600	5	0.073
1588377600	6	0.05
1588377600	9	0.034
1588378500	2	0.034
1588378500	3	0.05
1588378500	5	0.076
1588378500	6	0.045
1588378500	9	0.044
1588379400	2	0.022
1588379400	3	0.05
1588379400	5	0.091
1588379400	6	0.038
1588379400	9	0.039
1588380300	2	0.027
1588380300	3	0.05
1588380300	5	0.067
1588380300	6	0.039
1588380300	9	0.045
1588381200	2	0.027
1588381200	3	0.05
1588381200	5	0.079
1588381200	6	0.027
1588381200	9	0.058
1588382100	2	0.017
1588382100	3	0.05
1588382100	5	0.071
1588382100	6	0.011
1588382100	9	0.061
1588383000	2	0.015
1588383000	3	0.05
1588383000	5	0.05
1588383000	6	0.047
1588383000	9	0.034
1588383900	2	0.025
1588383900	3	0.051
1588383900	5	0.048
1588383900	6	0.043
1588383900	9	0.049
1588384800	2	0.018
1588384800	3	0.05
1588384800	5	0.06
1588384800	6	0.043
1588384800	9	0.04
1588385700	2	0.013
1588385700	3	0.051
1588385700	5	0.019
1588385700	6	0.042
1588385700	9	0.027
1588386600	2	0.022
1588386600	3	0.05
1588386600	5	0.056
1588386600	6	0.042
1588386600	9	0.07
1588387500	2	0.018
1588387500	3	0.051
1588387500	5	0.019
1588387500	6	0.025
1588387500	9	0.042
1588388400	2	0.008
1588388400	3	0.049
1588388400	5	0.047
1588388400	6	0.004
1588388400	9	0.026
1588389300	2	0.022
1588389300	3	0.049
1588389300	5	0.03
1588389300	6	0.003
1588389300	9	0.008
1588390200	2	0.02
1588390200	3	0.048
1588390200	5	0.032
1588390200	6	0.041
1588390200	9	0.018
1588391100	2	0.007
1588391100	3	0.049
1588391100	5	0.04
1588391100	6	0.037
1588391100	9	0.026
1588392000	2	0.02
1588392000	3	0.05
1588392000	5	0.021
1588392000	6	0.003
1588392000	9	0.056
1588392900	2	0.022
1588392900	3	0.05
1588392900	5	0.039
1588392900	6	0.003
1588392900	9	0.01
1588393800	2	0.007
1588393800	3	0.05
1588393800	5	0.017
1588393800	6	0.003
1588393800	9	0.025
1588394700	2	0.018
1588394700	3	0.051
1588394700	5	0.022
1588394700	6	0.003
1588394700	9	0.023
1588395600	2	0.021
1588395600	3	0.05
1588395600	5	0.023
1588395600	6	0.003
1588395600	9	0.004
1588396500	2	0.01
1588396500	3	0.05
1588396500	5	0.015
1588396500	6	0.003
1588396500	9	0.035
1588397400	2	0.015
1588397400	3	0.05
1588397400	5	0.029
1588397400	6	0.003
1588397400	9	0.054
1588398300	2	0.021
1588398300	3	0.051
1588398300	5	0.02
1588398300	6	0.003
1588398300	9	0.008
1588399200	2	0.012
1588399200	3	0.05
1588399200	5	0.019
1588399200	6	0.004
1588399200	9	0.017
1588400100	2	0.013
1588400100	3	0.051
1588400100	5	0.026
1588400100	6	0.003
1588400100	9	0.024
1588401000	2	0.02
1588401000	3	0.05
1588401000	5	0.011
1588401000	6	0.003
1588401000	9	0.012
1588401900	2	0.014
1588401900	3	0.05
1588401900	5	0.031
1588401900	6	0.003
1588401900	9	0.033
1588402800	2	0.011
1588402800	3	0.051
1588402800	5	0.009
1588402800	6	0.003
1588402800	9	0.046
1588403700	2	0.02
1588403700	3	0.05
1588403700	5	0.025
1588403700	6	0.003
1588403700	9	0.015
1588404600	2	0.017
1588404600	3	0.05
1588404600	5	0.022
1588404600	6	0.004
1588404600	9	0.01
1588405500	2	0.008
1588405500	3	0.049
1588405500	5	0.016
1588405500	6	0.003
1588405500	9	0.024
1588406400	2	0.021
1588406400	3	0.048
1588406400	5	0.031
1588406400	6	0.003
1588406400	9	0.016
1588407300	2	0.018
1588407300	3	0.049
1588407300	5	0.006
1588407300	6	0.003
1588407300	9	0.031
1588408200	2	0.039
1588408200	3	0.048
1588408200	5	0.033
1588408200	6	0.003
1588408200	9	0.044
1588409100	2	0.037
1588409100	3	0.048
1588409100	5	0.008
1588409100	6	0.003
1588409100	9	0.017
1588410000	2	0.025
1588410000	3	0.048
1588410000	5	0.024
1588410000	6	0.003
1588410000	9	0.008
1588410900	2	0.085
1588410900	3	0.048
1588410900	5	0.022
1588410900	6	0.003
1588410900	9	0.024
1588411800	2	0.213
1588411800	3	0.049
1588411800	5	0.014
1588411800	6	0.003
1588411800	9	0.015
1588412700	2	0.198
1588412700	3	0.047
1588412700	5	0.048
1588412700	6	0.004
1588412700	9	0.032
1588413600	2	0.204
1588413600	3	0.049
1588413600	5	0.021
1588413600	6	0.003
1588413600	9	0.044
1588414500	2	0.188
1588414500	3	0.035
1588414500	5	0.059
1588414500	6	0.003
1588414500	9	0.013
1588415400	2	0.201
1588415400	3	0.0
1588415400	5	0.019
1588415400	6	0.005
1588415400	9	0.011
1588416300	2	0.198
1588416300	3	0.0
1588416300	5	0.053
1588416300	6	0.019
1588416300	9	0.024
1588417200	2	0.183
1588417200	3	0.0
1588417200	5	0.015
1588417200	6	0.049
1588417200	9	0.009
1588418100	2	0.194
1588418100	3	0.0
1588418100	5	0.025
1588418100	6	0.045
1588418100	9	0.028
1588419000	2	0.242
1588419000	3	0.0
1588419000	5	0.021
1588419000	6	0.05
1588419000	9	0.053
1588419900	2	0.181
1588419900	3	0.0
1588419900	5	0.013
1588419900	6	0.051
1588419900	9	0.005
1588420800	2	0.086
1588420800	3	0.0
1588420800	5	0.031
1588420800	6	0.016
1588420800	9	0.02
1588421700	2	0.022
1588421700	3	0.0
1588421700	5	0.008
1588421700	6	0.039
1588421700	9	0.034
1588422600	2	0.009
1588422600	3	0.0
1588422600	5	0.029
1588422600	6	0.008
1588422600	9	0.001
1588423500	2	0.016
1588423500	3	0.0
1588423500	5	0.029
1588423500	6	0.012
1588423500	9	0.027
1588424400	2	0.02
1588424400	3	0.0
1588424400	5	0.023
1588424400	6	0.019
1588424400	9	0.065
1588425300	2	0.011
1588425300	3	0.0
1588425300	5	0.025
1588425300	6	0.011
1588425300	9	0.004
1588426200	2	0.014
1588426200	3	0.0
1588426200	5	0.014
1588426200	6	0.026
1588426200	9	0.028
1588427100	2	0.021
1588427100	3	0.0
1588427100	5	0.027
1588427100	6	0.005
1588427100	9	0.019
1588428000	2	0.013
1588428000	3	0.0
1588428000	5	0.02
1588428000	6	0.035
1588428000	9	0.008
1588428900	2	0.012
1588428900	3	0.0
1588428900	5	0.017
1588428900	6	0.027
1588428900	9	0.026
1588429800	2	0.021
1588429800	3	0.0
1588429800	5	0.027
1588429800	6	0.005
1588429800	9	0.043
1588430700	2	0.014
1588430700	3	0.0
1588430700	5	0.013
1588430700	6	0.005
1588430700	9	0.027
1588431600	2	0.026
1588431600	3	0.0
1588431600	5	0.046
1588431600	6	0.005
1588431600	9	0.029
1588432500	2	0.048
1588432500	3	0.0
1588432500	5	0.01
1588432500	6	0.007
1588432500	9	0.033
1588433400	2	0.049
1588433400	3	0.0
1588433400	5	0.04
1588433400	6	0.007
1588433400	9	0.026
1588434300	2	0.051
1588434300	3	0.0
1588434300	5	0.022
1588434300	6	0.023
1588434300	9	0.042
1588435200	2	0.056
1588435200	3	0.0
1588435200	5	0.032
1588435200	6	0.047
1588435200	9	0.065
1588436100	2	0.037
1588436100	3	0.0
1588436100	5	0.038
1588436100	6	0.045
1588436100	9	0.035
1588437000	2	0.053
1588437000	3	0.0
1588437000	5	0.019
1588437000	6	0.038
1588437000	9	0.042
1588437900	2	0.05
1588437900	3	0.0
1588437900	5	0.028
1588437900	6	0.003
1588437900	9	0.067
1588438800	2	0.037
1588438800	3	0.0
1588438800	5	0.043
1588438800	6	0.032
1588438800	9	0.496
1588439700	2	0.051
1588439700	3	0.0
1588439700	5	0.019
1588439700	6	0.043
1588439700	9	0.295
1588440600	2	0.05
1588440600	3	0.0
1588440600	5	0.054
1588440600	6	0.042
1588440600	9	0.075
1588441500	2	0.036
1588441500	3	0.0
1588441500	5	0.02
1588441500	6	0.041
1588441500	9	0.033
1588442400	2	0.048
1588442400	3	0.0
1588442400	5	0.047
1588442400	6	0.04
1588442400	9	0.038
1588443300	2	0.051
1588443300	3	0.0
1588443300	5	0.032
1588443300	6	0.02
1588443300	9	0.041
1588444200	2	0.019
1588444200	3	0.0
1588444200	5	0.029
1588444200	6	0.004
1588444200	9	0.028
1588445100	2	0.02
1588445100	3	0.0
1588445100	5	0.043
1588445100	6	0.004
1588445100	9	0.034
1588446000	2	0.025
1588446000	3	0.0
1588446000	5	0.032
1588446000	6	0.003
1588446000	9	0.078
1588446900	2	0.016
1588446900	3	0.0
1588446900	5	0.031
1588446900	6	0.004
1588446900	9	0.029
1588447800	2	0.017
1588447800	3	0.0
1588447800	5	0.043
1588447800	6	0.003
1588447800	9	0.026
1588448700	2	0.025
1588448700	3	0.0
1588448700	5	0.021
1588448700	6	0.003
1588448700	9	0.041
1588449600	2	0.041
1588449600	3	0.0
1588449600	5	0.038
1588449600	6	0.006
1588449600	9	0.027
1588450500	2	0.039
1588450500	3	0.0
1588450500	5	0.039
1588450500	6	0.012
1588450500	9	0.05
1588451400	2	0.053
1588451400	3	0.0
1588451400	5	0.021
1588451400	6	0.007
1588451400	9	0.054
1588452300	2	0.048
1588452300	3	0.0
1588452300	5	0.073
1588452300	6	0.007
1588452300	9	0.03
1588453200	2	0.043
1588453200	3	0.0
1588453200	5	0.788
1588453200	6	0.011
1588453200	9	0.023
1588454100	2	0.052
1588454100	3	0.001
1588454100	5	0.075
1588454100	6	0.026
1588454100	9	0.044
1588455000	2	0.043
1588455000	3	0.045
1588455000	5	0.039
1588455000	6	0.013
1588455000	9	0.037
1588455900	2	0.045
1588455900	3	0.049
1588455900	5	0.038
1588455900	6	0.033
1588455900	9	0.063
1588456800	2	0.055
1588456800	3	0.049
1588456800	5	0.066
1588456800	6	0.059
1588456800	9	0.043
1588457700	2	0.048
1588457700	3	0.048
1588457700	5	0.071
1588457700	6	0.054
1588457700	9	0.029
1588458600	2	0.046
1588458600	3	0.049
1588458600	5	0.058
1588458600	6	0.046
1588458600	9	0.032
1588459500	2	0.044
1588459500	3	0.048
1588459500	5	0.074
1588459500	6	0.043
1588459500	9	0.043
1588460400	2	0.045
1588460400	3	0.049
1588460400	5	0.044
1588460400	6	0.05
1588460400	9	0.052
1588461300	2	0.02
1588461300	3	0.049
1588461300	5	0.08
1588461300	6	0.021
1588461300	9	0.049
1588462200	2	0.034
1588462200	3	0.05
1588462200	5	0.048
1588462200	6	0.048
1588462200	9	0.043
1588463100	2	0.033
1588463100	3	0.049
1588463100	5	0.065
1588463100	6	0.058
1588463100	9	0.018
1588464000	2	0.02
1588464000	3	0.049
1588464000	5	0.065
1588464000	6	0.057
1588464000	9	0.057
1588464900	2	0.029
1588464900	3	0.05
1588464900	5	0.051
1588464900	6	0.055
1588464900	9	0.042
1588465800	2	0.033
1588465800	3	0.05
1588465800	5	0.104
1588465800	6	0.023
1588465800	9	0.072
1588466700	2	0.023
1588466700	3	0.05
1588466700	5	0.078
1588466700	6	0.013
1588466700	9	0.026
1588467600	2	0.025
1588467600	3	0.05
1588467600	5	1.078
1588467600	6	0.013
1588467600	9	0.041
1588468500	2	0.033
1588468500	3	0.05
1588468500	5	0.09
1588468500	6	0.012
1588468500	9	0.027
1588469400	2	0.026
1588469400	3	0.05
1588469400	5	0.092
1588469400	6	0.012
1588469400	9	0.029
1588470300	2	0.022
1588470300	3	0.05
1588470300	5	0.096
1588470300	6	0.007
1588470300	9	0.056
1588471200	2	0.033
1588471200	3	0.051
1588471200	5	0.073
1588471200	6	0.003
1588471200	9	0.024
1588472100	2	0.027
1588472100	3	0.05
1588472100	5	0.084
1588472100	6	0.004
1588472100	9	0.014
1588473000	2	0.008
1588473000	3	0.05
1588473000	5	0.056
1588473000	6	0.003
1588473000	9	0.024
1588473900	2	0.021
1588473900	3	0.05
1588473900	5	0.06
1588473900	6	0.003
1588473900	9	0.007
1588474800	2	0.021
1588474800	3	0.05
1588474800	5	0.032
1588474800	6	0.004
1588474800	9	0.027
1588475700	2	0.006
1588475700	3	0.05
1588475700	5	0.03
1588475700	6	0.003
1588475700	9	0.06
1588476600	2	0.019
1588476600	3	0.05
1588476600	5	0.033
1588476600	6	0.003
1588476600	9	0.005
1588477500	2	0.021
1588477500	3	0.049
1588477500	5	0.001
1588477500	6	0.003
1588477500	9	0.024
1588478400	2	0.009
1588478400	3	0.05
1588478400	5	0.041
1588478400	6	0.003
1588478400	9	0.0
1588479300	2	0.039
1588479300	3	0.05
1588479300	5	0.005
1588479300	6	0.003
1588479300	9	0.025
1588480200	2	0.038
1588480200	3	0.05
1588480200	5	0.032
1588480200	6	0.003
1588480200	9	0.05
1588481100	2	0.025
1588481100	3	0.051
1588481100	5	0.014
1588481100	6	0.003
1588481100	9	0.014
1588482000	2	0.041
1588482000	3	0.05
1588482000	5	0.012
1588482000	6	0.003
1588482000	9	0.025
1588482900	2	0.037
1588482900	3	0.05
1588482900	5	0.033
1588482900	6	0.003
1588482900	9	0.008
1588483800	2	0.026
1588483800	3	0.05
1588483800	5	0.002
1588483800	6	0.003
1588483800	9	0.016
1588484700	2	0.02
1588484700	3	0.05
1588484700	5	0.039
1588484700	6	0.003
1588484700	9	0.031
1588485600	2	0.014
1588485600	3	0.05
1588485600	5	0.01
1588485600	6	0.004
1588485600	9	0.035
1588486500	2	0.026
1588486500	3	0.051
1588486500	5	0.019
1588486500	6	0.003
1588486500	9	0.024
1588487400	2	0.014
1588487400	3	0.05
1588487400	5	0.024
1588487400	6	0.003
1588487400	9	0.022
1588488300	2	0.014
1588488300	3	0.049
1588488300	5	0.011
1588488300	6	0.003
1588488300	9	0.003
1588489200	2	0.023
1588489200	3	0.05
1588489200	5	0.023
1588489200	6	0.003
1588489200	9	0.024
1588490100	2	0.015
1588490100	3	0.05
1588490100	5	0.013
1588490100	6	0.003
1588490100	9	0.028
1588491000	2	0.012
1588491000	3	0.049
1588491000	5	0.034
1588491000	6	0.003
1588491000	9	0.036
1588491900	2	0.022
1588491900	3	0.049
1588491900	5	0.016
1588491900	6	0.003
1588491900	9	0.025
1588492800	2	0.016
1588492800	3	0.05
1588492800	5	0.019
1588492800	6	0.003
1588492800	9	0.0
1588493700	2	0.009
1588493700	3	0.049
1588493700	5	0.011
1588493700	6	0.003
1588493700	9	0.024
1588494600	2	0.022
1588494600	3	0.05
1588494600	5	0.024
1588494600	6	0.003
1588494600	9	0.015
1588495500	2	0.018
1588495500	3	0.05
1588495500	5	0.017
1588495500	6	0.003
1588495500	9	0.038
1588496400	2	0.007
1588496400	3	0.049
1588496400	5	0.011
1588496400	6	0.003
1588496400	9	0.037
1588497300	2	0.021
1588497300	3	0.05
1588497300	5	0.031
1588497300	6	0.003
1588497300	9	0.002
1588498200	2	0.02
1588498200	3	0.05
1588498200	5	0.001
1588498200	6	0.003
1588498200	9	0.023
1588499100	2	0.006
1588499100	3	0.05
1588499100	5	0.035
1588499100	6	0.003
1588499100	9	0.02
1588500000	2	0.019
1588500000	3	0.05
1588500000	5	0.007
1588500000	6	0.003
1588500000	9	0.004
1588500900	2	0.021
1588500900	3	0.033
1588500900	5	0.013
1588500900	6	0.003
1588500900	9	0.051
1588501800	2	0.006
1588501800	3	0.0
1588501800	5	0.03
1588501800	6	0.007
1588501800	9	0.019
1588502700	2	0.07
1588502700	3	0.0
1588502700	5	0.003
1588502700	6	0.008
1588502700	9	0.019
1588503600	2	0.03
1588503600	3	0.0
1588503600	5	0.031
1588503600	6	0.006
1588503600	9	0.02
1588504500	2	0.034
1588504500	3	0.0
1588504500	5	0.009
1588504500	6	0.009
1588504500	9	0.005
1588505400	2	0.046
1588505400	3	0.0
1588505400	5	0.022
1588505400	6	0.01
1588505400	9	0.024
1588506300	2	0.03
1588506300	3	0.0
1588506300	5	0.017
1588506300	6	0.046
1588506300	9	0.175
1588507200	2	0.008
1588507200	3	0.0
1588507200	5	0.018
1588507200	6	0.044
1588507200	9	0.047
1588508100	2	0.021
1588508100	3	0.0
1588508100	5	0.017
1588508100	6	0.048
1588508100	9	0.036
1588509000	2	0.022
1588509000	3	0.0
1588509000	5	0.017
1588509000	6	0.029
1588509000	9	0.01
1588509900	2	0.009
1588509900	3	0.0
1588509900	5	0.026
1588509900	6	0.003
1588509900	9	0.022
1588510800	2	0.019
1588510800	3	0.0
1588510800	5	0.014
1588510800	6	0.002
1588510800	9	0.03
1588511700	2	0.022
1588511700	3	0.0
1588511700	5	0.035
1588511700	6	0.003
1588511700	9	0.01
1588512600	2	0.011
1588512600	3	0.0
1588512600	5	0.007
1588512600	6	0.003
1588512600	9	0.061
1588513500	2	0.017
1588513500	3	0.0
1588513500	5	0.03
1588513500	6	0.002
1588513500	9	0.002
1588514400	2	0.022
1588514400	3	0.0
1588514400	5	0.019
1588514400	6	0.003
1588514400	9	0.023
1588515300	2	0.014
1588515300	3	0.0
1588515300	5	0.011
1588515300	6	0.002
1588515300	9	0.016
1588516200	2	0.014
1588516200	3	0.0
1588516200	5	0.037
1588516200	6	0.003
1588516200	9	0.011
1588517100	2	0.022
1588517100	3	0.0
1588517100	5	0.004
1588517100	6	0.003
1588517100	9	0.038
1588518000	2	0.041
1588518000	3	0.0
1588518000	5	0.051
1588518000	6	0.002
1588518000	9	0.043
1588518900	2	0.041
1588518900	3	0.0
1588518900	5	0.016
1588518900	6	0.004
1588518900	9	0.019
1588519800	2	0.052
1588519800	3	0.0
1588519800	5	0.04
1588519800	6	0.003
1588519800	9	0.029
1588520700	2	0.038
1588520700	3	0.0
1588520700	5	0.039
1588520700	6	0.003
1588520700	9	0.008
1588521600	2	0.048
1588521600	3	0.0
1588521600	5	0.026
1588521600	6	0.005
1588521600	9	0.021
1588522500	2	0.05
1588522500	3	0.0
1588522500	5	0.053
1588522500	6	0.004
1588522500	9	0.051
1588523400	2	0.041
1588523400	3	0.0
1588523400	5	0.02
1588523400	6	0.002
1588523400	9	0.032
1588524300	2	0.042
1588524300	3	0.0
1588524300	5	0.193
1588524300	6	0.02
1588524300	9	0.019
1588525200	2	0.036
1588525200	3	0.0
1588525200	5	0.11
1588525200	6	0.046
1588525200	9	0.028
1588526100	2	0.018
1588526100	3	0.0
1588526100	5	0.049
1588526100	6	0.044
1588526100	9	0.015
1588527000	2	0.014
1588527000	3	0.0
1588527000	5	0.027
1588527000	6	0.032
1588527000	9	0.015
1588527900	2	0.025
1588527900	3	0.0
1588527900	5	0.042
1588527900	6	0.003
1588527900	9	0.069
1588528800	2	0.041
1588528800	3	0.0
1588528800	5	0.048
1588528800	6	0.377
1588528800	9	0.024
1588529700	2	0.038
1588529700	3	0.0
1588529700	5	0.019
1588529700	6	0.007
1588529700	9	0.025
1588530600	2	0.053
1588530600	3	0.0
1588530600	5	0.048
1588530600	6	0.004
1588530600	9	0.043
1588531500	2	0.031
1588531500	3	0.0
1588531500	5	0.032
1588531500	6	0.019
1588531500	9	0.038
1588532400	2	0.012
1588532400	3	0.0
1588532400	5	0.039
1588532400	6	0.012
1588532400	9	0.041
1588533300	2	0.024
1588533300	3	0.0
1588533300	5	0.037
1588533300	6	0.032
1588533300	9	0.063
1588534200	2	0.024
1588534200	3	0.0
1588534200	5	0.047
1588534200	6	0.014
1588534200	9	0.041
1588535100	2	0.01
1588535100	3	0.0
1588535100	5	0.047
1588535100	6	0.037
1588535100	9	0.021
1588536000	2	0.029
1588536000	3	0.0
1588536000	5	0.905
1588536000	6	0.048
1588536000	9	0.037
1588536900	2	0.035
1588536900	3	0.0
1588536900	5	0.261
1588536900	6	0.059
1588536900	9	0.049
1588537800	2	0.021
1588537800	3	0.0
1588537800	5	0.069
1588537800	6	0.019
1588537800	9	0.055
1588538700	2	0.034
1588538700	3	0.0
1588538700	5	0.044
1588538700	6	0.03
1588538700	9	0.035
1588539600	2	0.05
1588539600	3	0.0
1588539600	5	0.043
1588539600	6	0.022
1588539600	9	0.043
1588540500	2	0.041
1588540500	3	0.016
1588540500	5	0.026
1588540500	6	0.187
1588540500	9	0.026
1588541400	2	0.051
1588541400	3	0.047
1588541400	5	0.034
1588541400	6	0.045
1588541400	9	0.034
1588542300	2	0.075
1588542300	3	0.047
1588542300	5	0.065
1588542300	6	0.013
1588542300	9	0.083
1588543200	2	0.043
1588543200	3	0.047
1588543200	5	0.032
1588543200	6	0.013
1588543200	9	0.026
1588544100	2	0.046
1588544100	3	0.048
1588544100	5	0.05
1588544100	6	0.012
1588544100	9	0.034
1588545000	2	0.054
1588545000	3	0.048
1588545000	5	0.044
1588545000	6	0.013
1588545000	9	0.05
1588545900	2	0.046
1588545900	3	0.049
1588545900	5	0.032
1588545900	6	0.012
1588545900	9	0.045
1588546800	2	0.042
1588546800	3	0.049
1588546800	5	0.043
1588546800	6	0.015
1588546800	9	0.067
1588547700	2	0.033
1588547700	3	0.049
1588547700	5	0.067
1588547700	6	0.02
1588547700	9	0.045
1588548600	2	0.02
1588548600	3	0.049
1588548600	5	0.065
1588548600	6	0.05
1588548600	9	0.038
1588549500	2	0.011
1588549500	3	0.049
1588549500	5	0.063
1588549500	6	0.049
1588549500	9	0.023
1588550400	2	0.024
1588550400	3	0.049
1588550400	5	0.537
1588550400	6	0.05
1588550400	9	0.043
1588551300	2	0.022
1588551300	3	0.049
1588551300	5	0.356
1588551300	6	0.051
1588551300	9	0.067
1588552200	2	0.01
1588552200	3	0.05
1588552200	5	0.107
1588552200	6	0.05
1588552200	9	0.032
1588553100	2	0.039
1588553100	3	0.05
1588553100	5	0.082
1588553100	6	0.052
1588553100	9	0.048
1588554000	2	0.04
1588554000	3	0.049
1588554000	5	0.052
1588554000	6	0.049
1588554000	9	0.032
1588554900	2	0.025
1588554900	3	0.049
1588554900	5	0.074
1588554900	6	0.047
1588554900	9	0.028
1588555800	2	0.042
1588555800	3	0.049
1588555800	5	0.057
1588555800	6	0.039
1588555800	9	0.069
1588556700	2	0.039
1588556700	3	0.049
1588556700	5	0.059
1588556700	6	0.037
1588556700	9	0.05
1588557600	2	0.024
1588557600	3	0.05
1588557600	5	0.074
1588557600	6	0.032
1588557600	9	0.012
1588558500	2	0.022
1588558500	3	0.048
1588558500	5	0.063
1588558500	6	0.013
1588558500	9	0.026
1588559400	2	0.014
1588559400	3	0.049
1588559400	5	0.048
1588559400	6	0.049
1588559400	9	0.011
1588560300	2	0.027
1588560300	3	0.049
1588560300	5	0.045
1588560300	6	0.053
1588560300	9	0.029
1588561200	2	0.015
1588561200	3	0.049
1588561200	5	0.026
1588561200	6	0.042
1588561200	9	0.05
1588562100	2	0.014
1588562100	3	0.049
1588562100	5	0.046
1588562100	6	0.041
1588562100	9	0.009
1588563000	2	0.024
1588563000	3	0.049
1588563000	5	0.028
1588563000	6	0.04
1588563000	9	0.017
1588563900	2	0.014
1588563900	3	0.05
1588563900	5	0.022
1588563900	6	0.007
1588563900	9	0.026
1588564800	2	0.014
1588564800	3	0.048
1588564800	5	0.023
1588564800	6	0.004
1588564800	9	0.014
1588565700	2	0.023
1588565700	3	0.049
1588565700	5	0.012
1588565700	6	0.041
1588565700	9	0.051
1588566600	2	0.014
1588566600	3	0.048
1588566600	5	0.028
1588566600	6	0.027
1588566600	9	0.025
1588567500	2	0.013
1588567500	3	0.049
1588567500	5	0.016
1588567500	6	0.003
1588567500	9	0.001
1588568400	2	0.022
1588568400	3	0.049
1588568400	5	0.021
1588568400	6	0.003
1588568400	9	0.024
1588569300	2	0.015
1588569300	3	0.05
1588569300	5	0.017
1588569300	6	0.003
1588569300	9	0.025
1588570200	2	0.011
1588570200	3	0.05
1588570200	5	0.017
1588570200	6	0.002
1588570200	9	0.041
1588571100	2	0.022
1588571100	3	0.05
1588571100	5	0.026
1588571100	6	0.003
1588571100	9	0.025
1588572000	2	0.016
1588572000	3	0.05
1588572000	5	0.014
1588572000	6	0.003
1588572000	9	0.018
1588572900	2	0.01
1588572900	3	0.051
1588572900	5	0.023
1588572900	6	0.003
1588572900	9	0.008
1588573800	2	0.021
1588573800	3	0.05
1588573800	5	0.012
1588573800	6	0.003
1588573800	9	0.025
1588574700	2	0.017
1588574700	3	0.049
1588574700	5	0.023
1588574700	6	0.004
1588574700	9	0.052
1588575600	2	0.009
1588575600	3	0.049
1588575600	5	0.025
1588575600	6	0.034
1588575600	9	0.013
1588576500	2	0.021
1588576500	3	0.049
1588576500	5	0.007
1588576500	6	0.041
1588576500	9	0.025
1588577400	2	0.018
1588577400	3	0.049
1588577400	5	0.03
1588577400	6	0.031
1588577400	9	0.009
1588578300	2	0.007
1588578300	3	0.049
1588578300	5	0.012
1588578300	6	0.003
1588578300	9	0.016
1588579200	2	0.022
1588579200	3	0.049
1588579200	5	0.021
1588579200	6	0.003
1588579200	9	0.059
1588580100	2	0.019
1588580100	3	0.049
1588580100	5	0.03
1588580100	6	0.003
1588580100	9	0.009
1588581000	2	0.006
1588581000	3	0.049
1588581000	5	0.001
1588581000	6	0.003
1588581000	9	0.022
1588581900	2	0.02
1588581900	3	0.048
1588581900	5	0.035
1588581900	6	0.003
1588581900	9	0.024
1588582800	2	0.02
1588582800	3	0.049
1588582800	5	0.021
1588582800	6	0.003
1588582800	9	0.001
1588583700	2	0.006
1588583700	3	0.049
1588583700	5	0.015
1588583700	6	0.003
1588583700	9	0.051
1588584600	2	0.019
1588584600	3	0.048
1588584600	5	0.036
1588584600	6	0.003
1588584600	9	0.03
1588585500	2	0.021
1588585500	3	0.049
1588585500	5	0.001
1588585500	6	0.003
1588585500	9	0.009
1588586400	2	0.006
1588586400	3	0.048
1588586400	5	0.032
1588586400	6	0.003
1588586400	9	0.025
1588587300	2	0.018
1588587300	3	0.04
1588587300	5	0.015
1588587300	6	0.003
1588587300	9	0.007
1588588200	2	0.02
1588588200	3	0.0
1588588200	5	0.008
1588588200	6	0.005
1588588200	9	0.032
1588589100	2	0.008
1588589100	3	0.0
1588589100	5	0.04
1588589100	6	0.008
1588589100	9	0.051
1588590000	2	0.017
1588590000	3	0.0
1588590000	5	0.001
1588590000	6	0.008
1588590000	9	0.324
1588590900	2	0.039
1588590900	3	0.0
1588590900	5	0.022
1588590900	6	0.007
1588590900	9	0.477
1588591800	2	0.085
1588591800	3	0.0
1588591800	5	0.025
1588591800	6	0.005
1588591800	9	0.276
1588592700	2	0.048
1588592700	3	0.0
1588592700	5	0.008
1588592700	6	0.009
1588592700	9	0.006
1588593600	2	0.203
1588593600	3	0.0
1588593600	5	0.033
1588593600	6	0.005
1588593600	9	0.163
1588594500	2	0.185
1588594500	3	0.0
1588594500	5	0.011
1588594500	6	0.005
1588594500	9	0.021
1588595400	2	0.194
1588595400	3	0.0
1588595400	5	0.021
1588595400	6	0.005
1588595400	9	0.009
1588596300	2	0.196
1588596300	3	0.0
1588596300	5	0.03
1588596300	6	0.004
1588596300	9	0.032
1588597200	2	0.183
1588597200	3	0.0
1588597200	5	0.025
1588597200	6	0.004
1588597200	9	0.014
1588598100	2	0.189
1588598100	3	0.0
1588598100	5	0.046
1588598100	6	0.003
1588598100	9	0.047
1588599000	2	0.197
1588599000	3	0.0
1588599000	5	0.027
1588599000	6	0.028
1588599000	9	0.033
1588599900	2	0.188
1588599900	3	0.0
1588599900	5	0.029
1588599900	6	0.045
1588599900	9	0.007
1588600800	2	0.186
1588600800	3	0.0
1588600800	5	0.034
1588600800	6	0.043
1588600800	9	0.021
1588601700	2	0.02
1588601700	3	0.0
1588601700	5	0.024
1588601700	6	0.042
1588601700	9	0.027
1588602600	2	0.015
1588602600	3	0.0
1588602600	5	0.056
1588602600	6	0.06
1588602600	9	0.019
1588603500	2	0.011
1588603500	3	0.0
1588603500	5	0.037
1588603500	6	0.002
1588603500	9	0.051
1588604400	2	0.023
1588604400	3	0.0
1588604400	5	0.032
1588604400	6	0.004
1588604400	9	0.016
1588605300	2	0.013
1588605300	3	0.0
1588605300	5	0.05
1588605300	6	0.005
1588605300	9	0.012
1588606200	2	0.028
1588606200	3	0.0
1588606200	5	0.039
1588606200	6	0.021
1588606200	9	0.03
1588607100	2	0.061
1588607100	3	0.0
1588607100	5	0.076
1588607100	6	0.042
1588607100	9	0.028
1588608000	2	0.073
1588608000	3	0.0
1588608000	5	0.102
1588608000	6	0.041
1588608000	9	0.051
1588608900	2	0.098
1588608900	3	0.0
1588608900	5	0.032
1588608900	6	0.04
1588608900	9	0.036
1588609800	2	0.103
1588609800	3	0.0
1588609800	5	0.042
1588609800	6	0.029
1588609800	9	0.017
1588610700	2	0.091
1588610700	3	0.0
1588610700	5	0.027
1588610700	6	0.002
1588610700	9	0.043
1588611600	2	0.048
1588611600	3	0.0
1588611600	5	0.012
1588611600	6	0.002
1588611600	9	0.049
1588612500	2	0.051
1588612500	3	0.0
1588612500	5	0.034
1588612500	6	0.002
1588612500	9	0.052
1588613400	2	0.038
1588613400	3	0.0
1588613400	5	0.019
1588613400	6	0.002
1588613400	9	0.042
1588614300	2	0.047
1588614300	3	0.0
1588614300	5	0.023
1588614300	6	0.002
1588614300	9	0.027
1588615200	2	0.05
1588615200	3	0.0
1588615200	5	0.027
1588615200	6	0.002
1588615200	9	0.017
1588616100	2	0.041
1588616100	3	0.0
1588616100	5	0.024
1588616100	6	0.001
1588616100	9	0.035
1588617000	2	0.054
1588617000	3	0.0
1588617000	5	0.021
1588617000	6	0.002
1588617000	9	0.067
1588617900	2	0.061
1588617900	3	0.0
1588617900	5	0.036
1588617900	6	0.002
1588617900	9	0.018
1588618800	2	0.046
1588618800	3	0.0
1588618800	5	0.03
1588618800	6	0.002
1588618800	9	0.035
1588619700	2	0.042
1588619700	3	0.0
1588619700	5	0.034
1588619700	6	0.002
1588619700	9	0.035
1588620600	2	0.052
1588620600	3	0.0
1588620600	5	0.04
1588620600	6	0.002
1588620600	9	0.015
1588621500	2	0.018
1588621500	3	0.0
1588621500	5	0.022
1588621500	6	0.004
1588621500	9	0.069
1588622400	2	0.018
1588622400	3	0.0
1588622400	5	0.039
1588622400	6	0.007
1588622400	9	0.026
1588623300	2	0.026
1588623300	3	0.0
1588623300	5	0.033
1588623300	6	0.005
1588623300	9	0.016
1588624200	2	0.019
1588624200	3	0.0
1588624200	5	0.027
1588624200	6	0.006
1588624200	9	0.031
1588625100	2	0.091
1588625100	3	0.0
1588625100	5	0.044
1588625100	6	0.004
1588625100	9	0.015
1588626000	2	0.065
1588626000	3	0.033
1588626000	5	0.018
1588626000	6	0.005
1588626000	9	0.069
1588626900	2	0.068
1588626900	3	0.049
1588626900	5	0.037
1588626900	6	0.006
1588626900	9	0.049
1588627800	2	0.072
1588627800	3	0.05
1588627800	5	0.038
1588627800	6	0.022
1588627800	9	0.017
1588628700	2	0.07
1588628700	3	0.049
1588628700	5	0.023
1588628700	6	0.023
1588628700	9	0.043
1588629600	2	0.056
1588629600	3	0.05
1588629600	5	0.043
1588629600	6	0.014
1588629600	9	0.031
1588630500	2	0.055
1588630500	3	0.05
1588630500	5	0.02
1588630500	6	0.057
1588630500	9	0.058
1588631400	2	0.057
1588631400	3	0.049
1588631400	5	0.397
1588631400	6	0.068
1588631400	9	0.055
1588632300	2	0.063
1588632300	3	0.048
1588632300	5	0.057
1588632300	6	0.056
1588632300	9	0.017
1588633200	2	0.025
1588633200	3	0.049
1588633200	5	0.041
1588633200	6	0.058
1588633200	9	0.042
1588634100	2	0.029
1588634100	3	0.049
1588634100	5	0.806
1588634100	6	0.055
1588634100	9	0.05
1588635000	2	0.036
1588635000	3	0.05
1588635000	5	0.217
1588635000	6	0.051
1588635000	9	0.058
1588635900	2	0.023
1588635900	3	0.049
1588635900	5	0.044
1588635900	6	0.041
1588635900	9	0.063
1588636800	2	0.029
1588636800	3	0.05
1588636800	5	0.078
1588636800	6	0.045
1588636800	9	0.038
1588637700	2	0.035
1588637700	3	0.05
1588637700	5	0.019
1588637700	6	0.026
1588637700	9	0.026
1588638600	2	0.022
1588638600	3	0.05
1588638600	5	0.044
1588638600	6	0.025
1588638600	9	0.044
1588639500	2	0.023
1588639500	3	0.05
1588639500	5	0.042
1588639500	6	0.056
1588639500	9	0.039
1588640400	2	0.026
1588640400	3	0.05
1588640400	5	0.022
1588640400	6	0.051
1588640400	9	0.06
1588641300	2	0.013
1588641300	3	0.049
1588641300	5	0.053
1588641300	6	0.05
1588641300	9	0.042
1588642200	2	0.018
1588642200	3	0.05
1588642200	5	0.026
1588642200	6	0.012
1588642200	9	0.023
1588643100	2	0.025
1588643100	3	0.051
1588643100	5	0.035
1588643100	6	0.011
1588643100	9	0.036
1588644000	2	0.015
1588644000	3	0.05
1588644000	5	0.052
1588644000	6	0.012
1588644000	9	0.042
1588644900	2	0.017
1588644900	3	0.05
1588644900	5	0.02
1588644900	6	0.012
1588644900	9	0.056
1588645800	2	0.024
1588645800	3	0.05
1588645800	5	0.04
1588645800	6	0.021
1588645800	9	0.044
1588646700	2	0.013
1588646700	3	0.05
1588646700	5	0.031
1588646700	6	0.042
1588646700	9	0.023
1588647600	2	0.016
1588647600	3	0.049
1588647600	5	0.03
1588647600	6	0.012
1588647600	9	0.03
1588648500	2	0.023
1588648500	3	0.048
1588648500	5	0.031
1588648500	6	0.003
1588648500	9	0.022
1588649400	2	0.015
1588649400	3	0.048
1588649400	5	0.026
1588649400	6	0.003
1588649400	9	0.041
1588650300	2	0.014
1588650300	3	0.048
1588650300	5	0.028
1588650300	6	0.003
1588650300	9	0.026
1588651200	2	0.023
1588651200	3	0.048
1588651200	5	0.012
1588651200	6	0.004
1588651200	9	0.007
1588652100	2	0.015
1588652100	3	0.049
1588652100	5	0.026
1588652100	6	0.004
1588652100	9	0.019
1588653000	2	0.014
1588653000	3	0.049
1588653000	5	0.014
1588653000	6	0.004
1588653000	9	0.023
1588653900	2	0.023
1588653900	3	0.049
1588653900	5	0.021
1588653900	6	0.003
1588653900	9	0.04
1588654800	2	0.016
1588654800	3	0.049
1588654800	5	0.031
1588654800	6	0.004
1588654800	9	0.027
1588655700	2	0.013
1588655700	3	0.047
1588655700	5	0.001
1588655700	6	0.004
1588655700	9	0.008
1588656600	2	0.023
1588656600	3	0.048
1588656600	5	0.036
1588656600	6	0.004
1588656600	9	0.018
1588657500	2	0.017
1588657500	3	0.048
1588657500	5	0.015
1588657500	6	0.003
1588657500	9	0.023
1588658400	2	0.012
1588658400	3	0.048
1588658400	5	0.006
1588658400	6	0.004
1588658400	9	0.031
1588659300	2	0.023
1588659300	3	0.05
1588659300	5	0.043
1588659300	6	0.004
1588659300	9	0.036
1588660200	2	0.017
1588660200	3	0.05
1588660200	5	0.003
1588660200	6	0.004
1588660200	9	0.01
1588661100	2	0.011
1588661100	3	0.05
1588661100	5	0.022
1588661100	6	0.003
[truncated: 8,000 more rows]
